# Supplementary material for: Cooperative and Antagonistic Contributions of Two Heterochromatin Proteins to Transcriptional Regulation of the Drosophila Sex Determination Decision
Source: PubMed Central journal article supplement (PMC3111545; doi:10.1371/journal.pgen.1002122), 2011-06-09
Supplement: pgen.1002122.s006.pdf [file pgen.1002122.s006.pdf]

|                              | Sequence                       | GadFly Coordinates |
|------------------------------|--------------------------------|--------------------|
| <b>PCR frag in Fig. 4:</b>   |                                |                    |
| +7101F                       | CAGCTCGCGATCGGTCATGT           | 6979712-6979731    |
| +7101R                       | CGGCGGAAATGGTGGGAGTG           | 6979916-6979897    |
| +1218F                       | GCCAAAGAGGTATGGGTAGC           | 6985512-6985531    |
| +1218R                       | GTGGTTATCCCCCATATGGC           | 6985743-6985724    |
| +138F                        | CGCTTATCCAGGGTTGCCATACCA       | 6986594-6986617    |
| +138R                        | CGGCACCCCTCTGTCGATCC           | 6986960-6986941    |
| -101F                        | GTCCTGCGGGCCATCGATCT           | 6986915-6986934    |
| -101R                        | CGGGGATCCGCGAAATGCAG           | 6987117-6987098    |
| -432F                        | GCCGAAAGGTGGAACGTGGC           | 6987225-6987244    |
| -432R                        | GTATTGTGCTGGTATTGCTTC          | 6987469-6987449    |
| -918F                        | TTTTGCTAGGATTCGGGTAG           | 6987721-6987741    |
| -918R                        | CTGTTCTTGGCGTTCGATTAG          | 6987944-6987924    |
| -1132F                       | CTAATCGAACGCCAAGAACAG          | 6987924-6987944    |
| -1132R                       | CTAGGGCTTAGGGCTCACTGG          | 6988169-6988149    |
| -1394F                       | TTCCAGTGAGCCCTAAGCCCTAGCC      | 6988147-6988171    |
| -1394R                       | TAGGCCGCCCCACCCACTTG           | 6988463-6988444    |
| -1810F                       | GCTGGAATGGGGTGGTACGG           | 6988510-6988529    |
| -1810R                       | CCCCAAAAGTTTTGTCCGTGATGGAC     | 6988940-6988915    |
| -2224F                       | GTCCATCACGGACAAAACCTTTGGGG     | 6988915-6988940    |
| -2224R                       | AGAACACACATTCACTCAAGCACTGC     | 6989362-6989337    |
| -2647F                       | GATGCATGTACACATCTGTGC          | 6989424-6989444    |
| -2647R                       | ATATGTTTCGGTTCGCAATG           | 6989719-6989699    |
| -3488F                       | GAAGCGAACATCTTCCCTTGC          | 6990249-6990269    |
| -3488R                       | CGACCGCCCTACGTCGACGGC          | 6990558-6990538    |
| -5094F                       | ACACGGATTGCATGGGGCACA          | 6991909-6991929    |
| -5094R                       | TGACCGACAACCGCGAAACGTG         | 6992109-6992088    |
| -5331F                       | CACGTTTCGCGGTTGTCGGTCA         | 6992088-6992109    |
| -5331R                       | TGAACGAAATCTAACGGGGCTCAAAAAGAC | 6992404-6992376    |
| <b>Sxl RT-PCR:</b>           |                                |                    |
| <i>SxlP1F</i>                | CACCGCTGCCCAGCGACAAT           | 6979801-6979820    |
| <i>SxlP2F</i>                | TTGCGTTTCGTTGGCGAGGACC         | 6982643-6982662    |
| <i>SxlP3R</i>                | GAGCGCTGAGCGCCAAAACAATTGA      | 6985955-6985931    |
| <b>Sxl in situs:</b>         |                                |                    |
| <i>SxlPeF</i>                | GTTTCTAAGCAGATCCCG             | 6986495-6986512    |
| <i>Sxl PeR</i>               | GTTCCACTCGTGACAAGTCC           | 6986902-6986883    |
| <i>SxlPmF</i>                | GGGCGATGCTTGCATGTTGC           | 6991059-6991078    |
| <i>SxlPmR</i>                | GCGAAACGTGCACACTGC             | 6992097-6992080    |
| <b>ChIP control primers:</b> |                                |                    |
| <i>RpA70F</i>                | CACCGCCGAGGCTCAAGGAC           | 4088834-4088853    |
| <i>RpA70R</i>                | TGCAAGGAGGTGGGCGAGTTG          | 4089056-4089036    |
| <i>hbF</i>                   | GCCTGTCAATGCTGGCGACTTTTCG      | 4523493-4523516    |
| <i>hbR</i>                   | GAAAGAGCGAACGCCACGAAGGG        | 4523867-4523845    |
| <i>kl-2F</i>                 | GGTTGCCCAATGTGAGTGAAGCGTC      | 82313-82337        |
| <i>kl-2R</i>                 | TCGCTTAGCTCGCCGCCGTA           | 82775-82756        |
